# Supplementary material for: Stabilization of hexa-coordinated P(v) corroles by axial silyloxy groups
Source: Royal Society of Chemistry journal article supplement (doi:10.1039/c6dt00842a), 2016-01-01
Supplement: c6dt00842a1.pdf [file c6dt00842a1.pdf]

**Chemicals:** All the solvents such as Chloroform, Toluene, Triethylamine, Dichloromethane, *n*-hexane, Benzene were dried by following available methods and distilled under inert atmosphere prior to use. Deuterated solvents such as CDCl<sub>3</sub> and C<sub>6</sub>D<sub>6</sub> were obtained from Aldrich and used as received. All the chemicals used for the synthesis were reagent grade. Column chromatography was performed using 60-120 mesh silica gel and basic aluminium oxide obtained from Sisco Research Laboratories, India.

**Instrumentation:** <sup>1</sup>H, <sup>13</sup>C and <sup>31</sup>P NMR spectra were recorded in C<sub>6</sub>D<sub>6</sub> using a Bruker 400 MHz and 500 MHz spectrometer and reported in δ ppm. Absorption spectra were obtained using Cary series UV-VIS NIR spectrophotometer. The fluorescence quantum yields ( $\phi_f$ ) were calculated from the emission and absorption spectra by a comparative method at a excitation wavelength of 430 nm using Tetratolyl porphyrin (H<sub>2</sub>TTP) ( $\phi_f = 0.11$ ) as the standard. The time resolved fluorescence decay measurement were carried out at magic angle (54.60) using a picoseconds diode laser based TCSPC fluorescence spectrometer from IBH, UK. All the decays were fitted to single exponential decay. Cyclic voltammetry (CV) studies are carried out with a BAS electrochemical system by utilizing the three-electrode configuration consisting of glassy carbon (working electrode), platinum wire (auxiliary electrode) and saturated calomel (reference electrode) electrodes. The experiments were carried out in dry dichloromethane using tetrabutylammonium perchlorate as the supporting electrolyte. The high resolution mass spectra (HRMS) were recorded on a Q-Tof micro mass spectrometer.

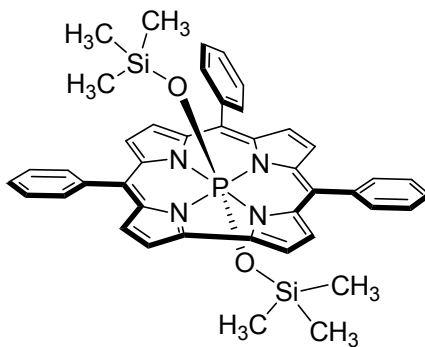

**Compound 2**  
Mol. Wt. = 732.25

**DEPARTMENT OF CHEMISTRY, I.I.T.(B)**

| Analysis Info |                                                                     | Acquisition Date 7/7/2015 10:27:04 PM |                           |
|---------------|---------------------------------------------------------------------|---------------------------------------|---------------------------|
| Analysis Name | C:\Documents and Settings\Administrator\Desktop\tamal\MR-TC-PORSi.d | Operator                              | MSB IN                    |
| Method        | Tune_pos_NAICSI-1500.m                                              | Instrument                            | maXis impact 282001.00081 |
| Sample Name   | MR-TC-PORSi                                                         |                                       |                           |
| Comment       | C43H41N4O2PSi2                                                      |                                       |                           |

| Acquisition Parameter |          |                       |            |                  |           |
|-----------------------|----------|-----------------------|------------|------------------|-----------|
| Source Type           | ESI      | Ion Polarity          | Positive   | Set Nebulizer    | 0.3 Bar   |
| Focus                 | Active   | Set Capillary         | 3800 V     | Set Dry Heater   | 180 °C    |
| Scan Begin            | 50 m/z   | Set End Plate Offset  | -500 V     | Set Dry Gas      | 4.0 l/min |
| Scan End              | 1500 m/z | Set Collision Cell RF | 1800.0 Vpp | Set Divert Valve | Source    |

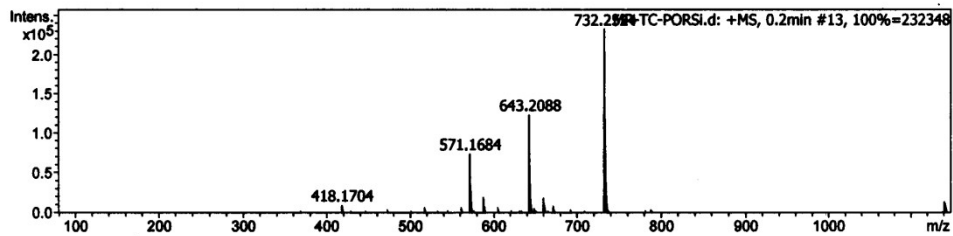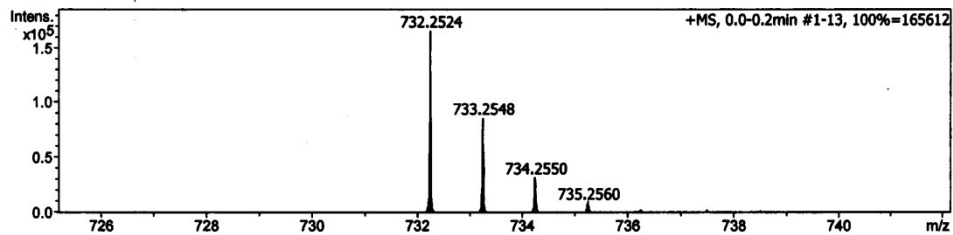

| Meas. m/z | # | Ion Formula    | m/z      | err [ppm] | mSigma | # Sigma | Score  | rdb  | e <sup>-</sup> Conf | N-Rule |
|-----------|---|----------------|----------|-----------|--------|---------|--------|------|---------------------|--------|
| 732.2524  | 1 | C43H41N4O2PSi2 | 732.2500 | -3.2      | 39.4   | 1       | 100.00 | 28.0 | odd                 | ok     |

**Figure S1: HR-MS mass spectrum of compound 2.**

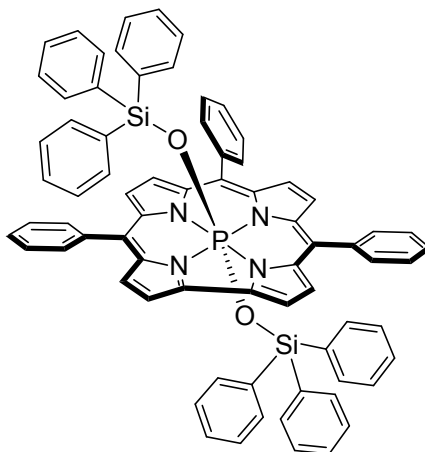

**Compound 3**  
Mol. Wt. = 1104.34

DEPARTMENT OF CHEMISTRY, I.I.T.(B)

| Analysis Info |                                    | Acquisition Date     |                           |
|---------------|------------------------------------|----------------------|---------------------------|
| Analysis Name | D:\Data\JAN-2016\MR-TC-PH3SIPCOR.d | 1/27/2016 7:47:51 PM |                           |
| Method        | Tune_pos_NAICSI-2000.m             | Operator             | SSK- OUT                  |
| Sample Name   | MR-TC-PH3SIPCOR                    | Instrument           | maXis impact 282001.00081 |
| Comment       | C73H53N4O2PSi2                     |                      |                           |

| Acquisition Parameter |          |                       |            |                  |           |
|-----------------------|----------|-----------------------|------------|------------------|-----------|
| Source Type           | ESI      | Ion Polarity          | Positive   | Set Nebulizer    | 0.3 Bar   |
| Focus                 | Active   | Set Capillary         | 3800 V     | Set Dry Heater   | 180 °C    |
| Scan Begin            | 50 m/z   | Set End Plate Offset  | -500 V     | Set Dry Gas      | 4.0 l/min |
| Scan End              | 2000 m/z | Set Collision Cell RF | 2100.0 Vpp | Set Divert Valve | Source    |

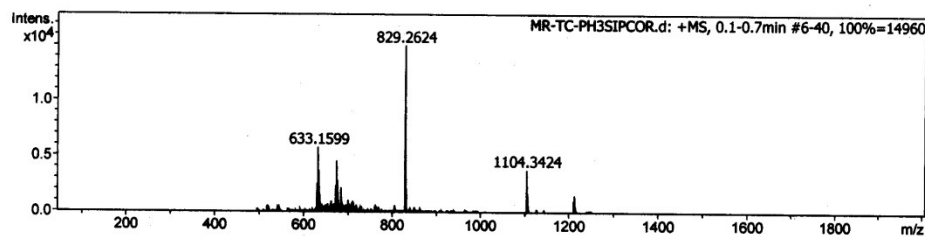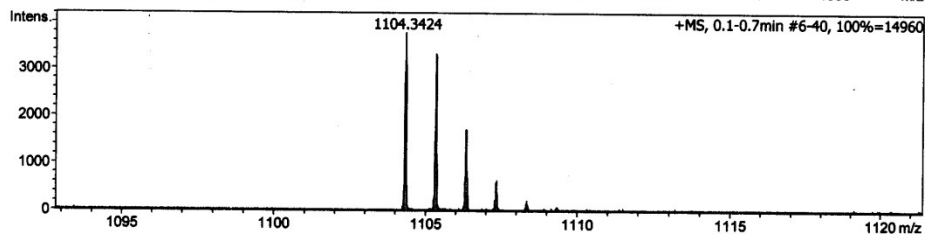

| Meas. m/z | # | Ion Formula    | m/z       | err [ppm] | mSigma | # Sigma | Score  | rdb  | e <sup>-</sup> Conf | N-Rule |
|-----------|---|----------------|-----------|-----------|--------|---------|--------|------|---------------------|--------|
| 1104.3424 | 1 | C73H53N4O2PSi2 | 1104.3439 | 1.3       | 17.3   | 1       | 100.00 | 52.0 | odd                 | ok     |

Figure S2: HR-MS mass spectrum of compound 3.

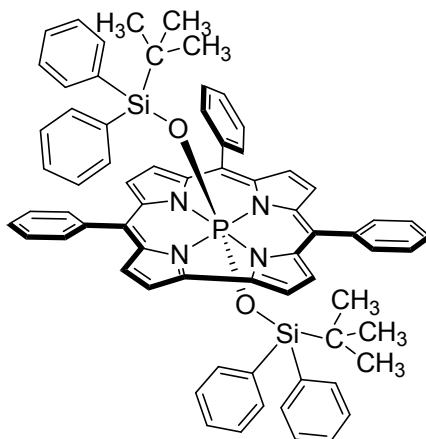

**Compound 4**  
Mol. Wt. = 1164.40

DEPARTMENT OF CHEMISTRY, I.I.T.(B)

|                      |                              |                                       |                           |
|----------------------|------------------------------|---------------------------------------|---------------------------|
| <b>Analysis Info</b> |                              | Acquisition Date 1/27/2016 8:21:00 PM |                           |
| Analysis Name        | D:\Data\JAN-2016\MR-TC-PH2.d | Operator                              | SSK- OUT                  |
| Method               | Tune_pos_NAICSI-2000.m       | Instrument                            | maXis impact 282001.00081 |
| Sample Name          | MR-TC-PH2                    |                                       |                           |
| Comment              | C89H61N4O2PSi2               |                                       |                           |

|                              |          |                       |            |
|------------------------------|----------|-----------------------|------------|
| <b>Acquisition Parameter</b> |          |                       |            |
| Source Type                  | ESI      | Ion Polarity          | Positive   |
| Focus                        | Active   | Set Capillary         | 3800 V     |
| Scan Begin                   | 50 m/z   | Set End Plate Offset  | -500 V     |
| Scan End                     | 2000 m/z | Set Collision Cell RF | 2100.0 Vpp |
|                              |          | Set Nebulizer         | 0.3 Bar    |
|                              |          | Set Dry Heater        | 180 °C     |
|                              |          | Set Dry Gas           | 4.0 l/min  |
|                              |          | Set Divert Valve      | Source     |

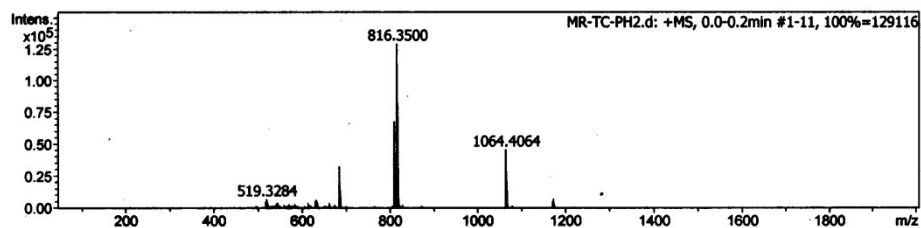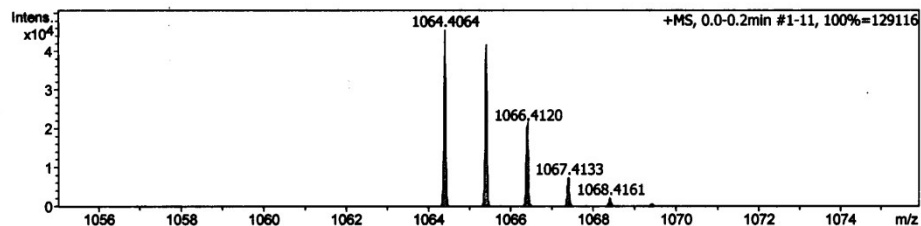

| Meas. m/z | # | Ion Formula    | m/z       | err [ppm] | mSigma | # Sigma | Score  | rdB  | e <sup>-</sup> Conf | N-Rule |
|-----------|---|----------------|-----------|-----------|--------|---------|--------|------|---------------------|--------|
| 1064.4064 | 1 | C89H61N4O2PSi2 | 1064.4065 | -0.1      | 22.2   | 1       | 100.00 | 44.0 | odd                 | ok     |

Figure S3: HR-MS mass spectrum of compound 4.

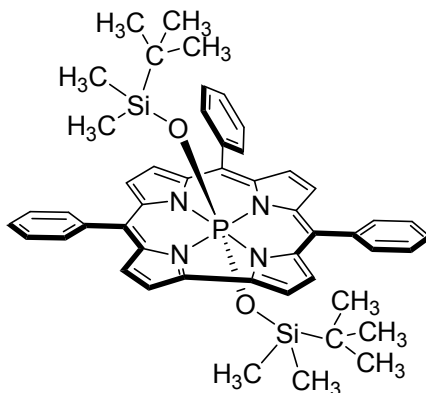

**Compound 5**  
Mol. Wt. = 816.34

DEPARTMENT OF CHEMISTRY, I.I.T.(B)

| Analysis Info |                               | Acquisition Date 1/27/2016 8:11:41 PM |                           |
|---------------|-------------------------------|---------------------------------------|---------------------------|
| Analysis Name | D:\Data\JAN-2016\MR-TC-CH32.d | Operator                              | SSK- OUT                  |
| Method        | Tune_pos_NAICSI-2000.m        | Instrument                            | maXis impact 282001.00081 |
| Sample Name   | MR-TC-CH32                    |                                       |                           |
| Comment       | C49H53N4O2PSi2                |                                       |                           |

| Acquisition Parameter |          |                       |            |                  |           |
|-----------------------|----------|-----------------------|------------|------------------|-----------|
| Source Type           | ESI      | Ion Polarity          | Positive   | Set Nebulizer    | 0.3 Bar   |
| Focus                 | Active   | Set Capillary         | 3800 V     | Set Dry Heater   | 180 °C    |
| Scan Begin            | 50 m/z   | Set End Plate Offset  | -500 V     | Set Dry Gas      | 4.0 l/min |
| Scan End              | 2000 m/z | Set Collision Cell RF | 2100.0 Vpp | Set Divert Valve | Source    |

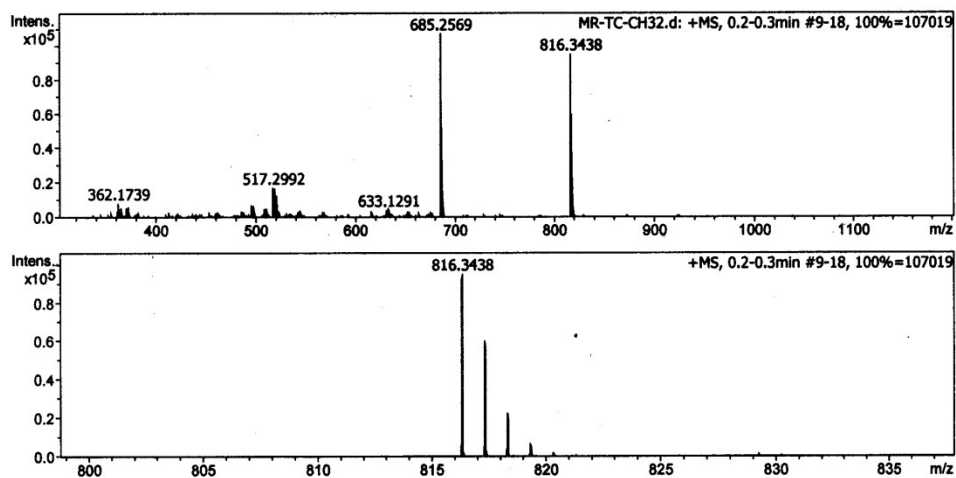

| Meas. m/z | # | Ion Formula    | m/z      | err [ppm] | mSigma | # Sigma | Score  | rdb  | e <sup>-</sup> Conf | N-Rule |
|-----------|---|----------------|----------|-----------|--------|---------|--------|------|---------------------|--------|
| 816.3438  | 1 | C49H53N4O2PSi2 | 816.3439 | 0.1       | 21.5   | 1       | 100.00 | 28.0 | odd                 | ok     |

Figure S4: HR-MS mass spectrum of compound 5.

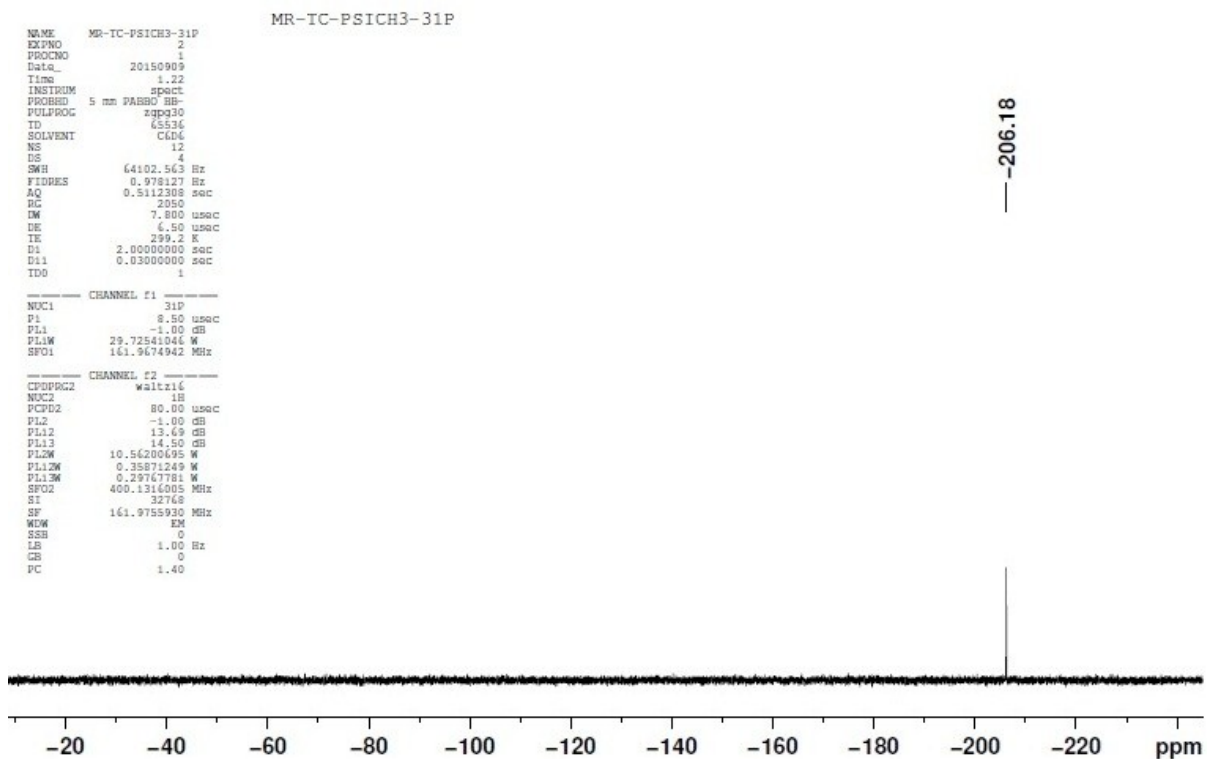

**Figure S5.**  $^{31}\text{P}$  NMR spectrum of compound **2** recorded in  $\text{C}_6\text{D}_6$  at room temperature.

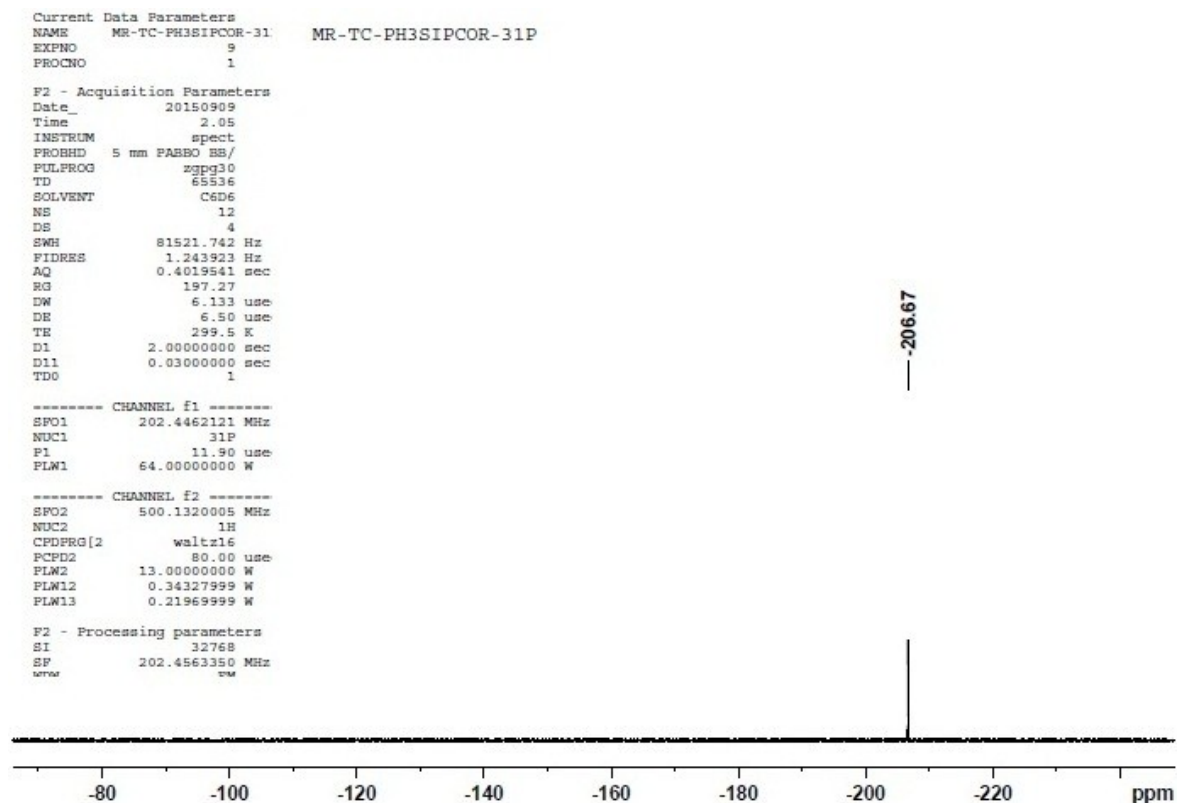

**Figure S6.**  $^{31}\text{P}$  NMR spectrum of compound **3** recorded in  $\text{C}_6\text{D}_6$  at room temperature.



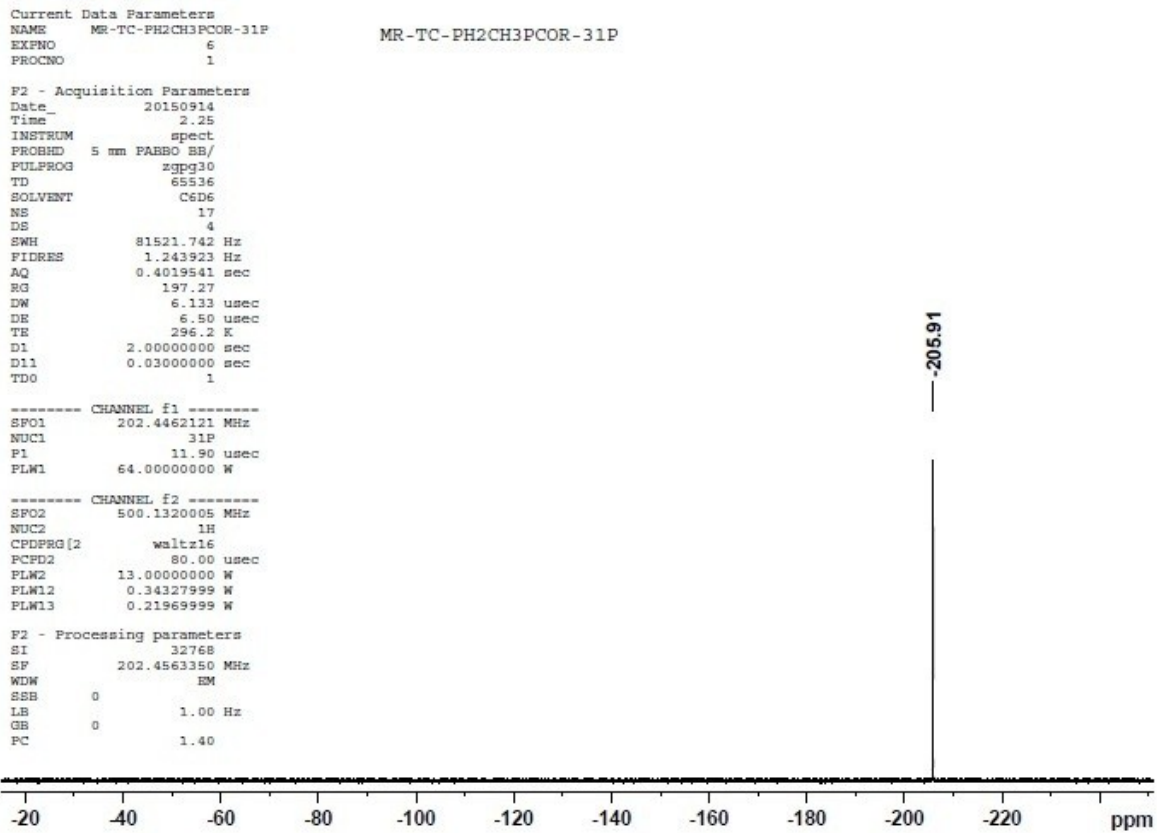

Figure S7.  $^{31}\text{P}$  NMR spectrum of compound **4** recorded in  $\text{C}_6\text{D}_6$  at room temperature.

Current Data Parameters  
NAME MR-TC-TBU-PCOR-31P  
EXPNO 2  
PROCNO 1

MR-TC-TBU-PCOR-31P

F2 - Acquisition Parameters  
Date\_ 20150913  
Time 22.17  
INSTRUM spect  
PROBHD 5 mm PABBO BB/  
PULPROG zgpg30  
TD 65536  
SOLVENT C6D6  
NS 27  
DS 4  
SWH 81521.742 Hz  
FIDRES 1.243923 Hz  
AQ 0.4019541 sec  
RG 197.27  
DW 6.133 usec  
DE 6.50 usec  
TE 296.6 K  
D1 2.00000000 sec  
D11 0.03000000 sec  
TDO 1

----- CHANNEL f1 -----  
SFO1 202.4462121 MHz  
NUC1 31P  
P1 11.90 usec  
PLW1 64.00000000 W

----- CHANNEL f2 -----  
SFO2 500.1320005 MHz  
NUC2 1H  
CFDPRG[2] waltz16  
PCPD2 80.00 usec  
PLW2 13.00000000 W  
PLW12 0.34327999 W  
PLW13 0.21969999 W

F2 - Processing parameters  
SI 32768  
SF 202.4563350 MHz  
WDW EM  
SSB 0  
LB 1.00 Hz  
GB 0  
PC 1.40

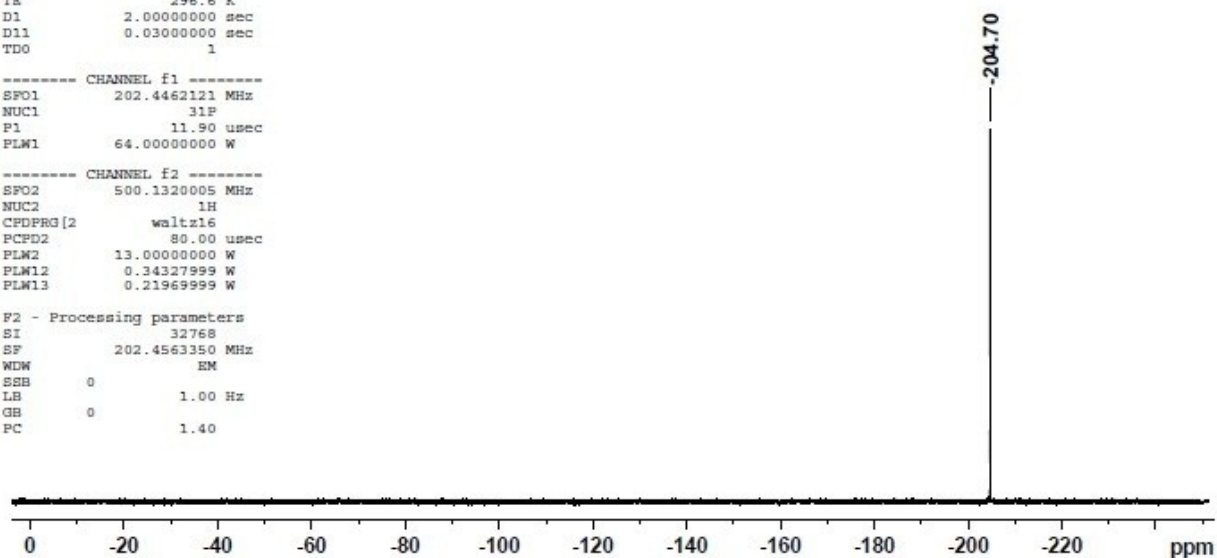

**Figure S8.**  $^{31}\text{P}$  NMR spectrum of compound **5** recorded in  $\text{C}_6\text{D}_6$  at room temperature.

MR-TC-PSICH3-13C

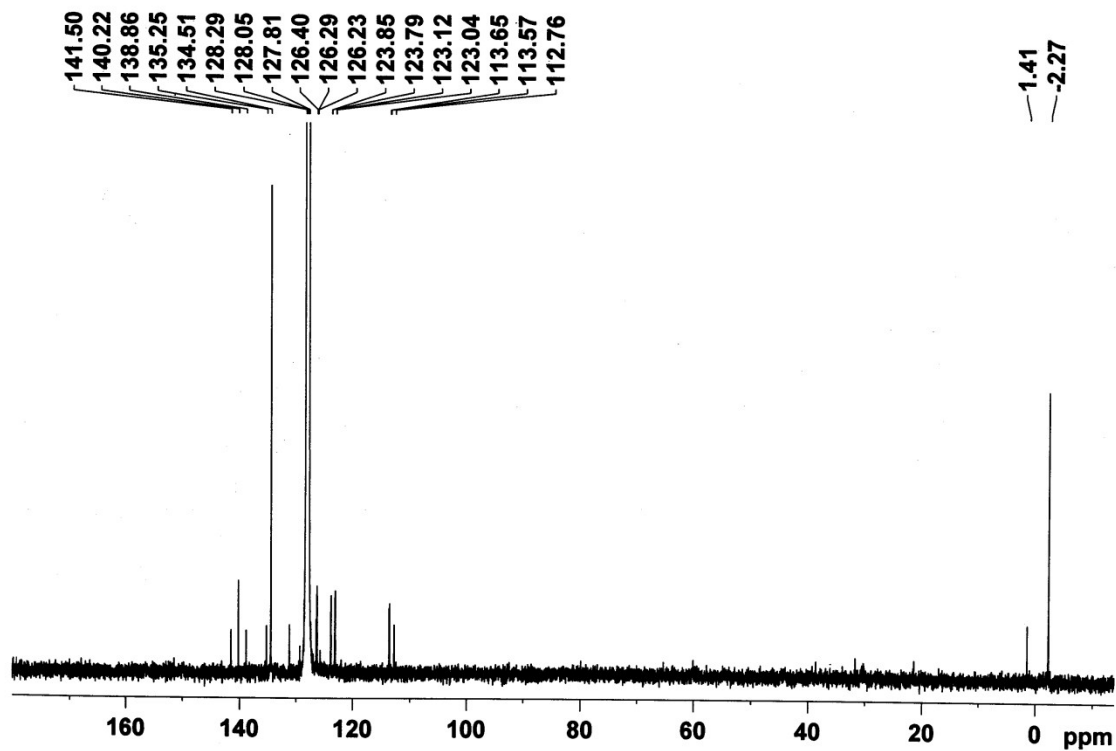

**Figure S9.**  $^{13}\text{C}$  NMR spectrum of compound **2** recorded in  $\text{C}_6\text{D}_6$  at room temperature.

MR-TC-PH3SIPCOR-13C

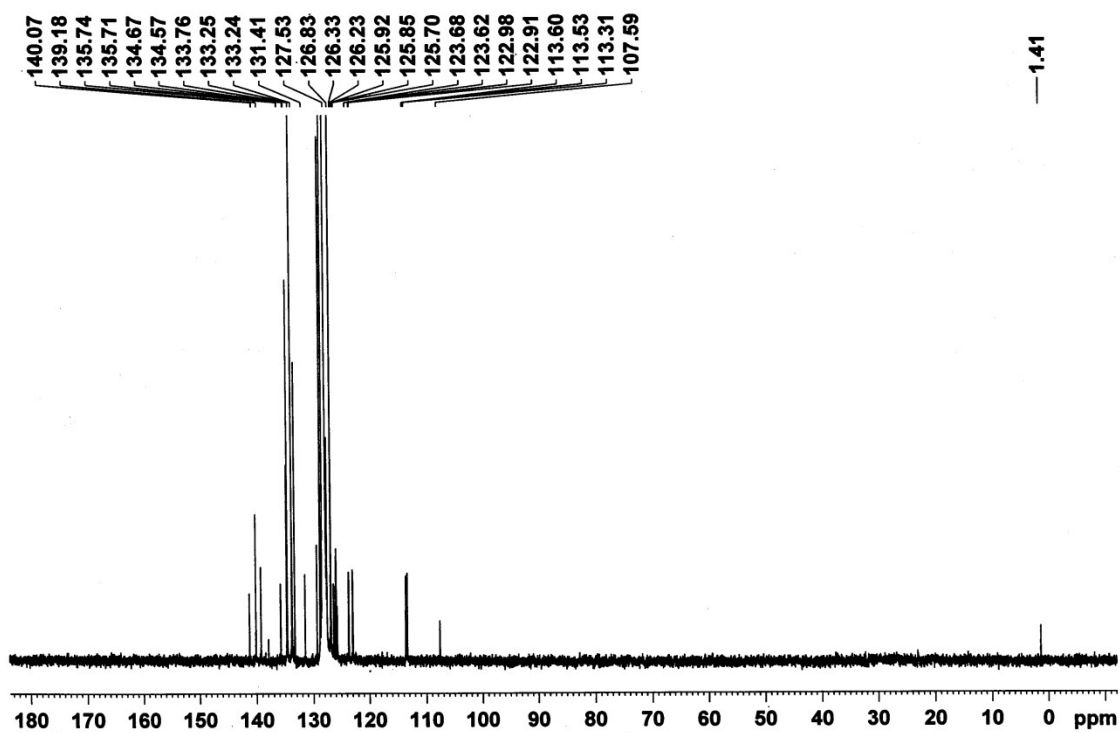

Figure S10. <sup>13</sup>C NMR spectrum of compound **3** recorded in C<sub>6</sub>D<sub>6</sub> at room temperature.

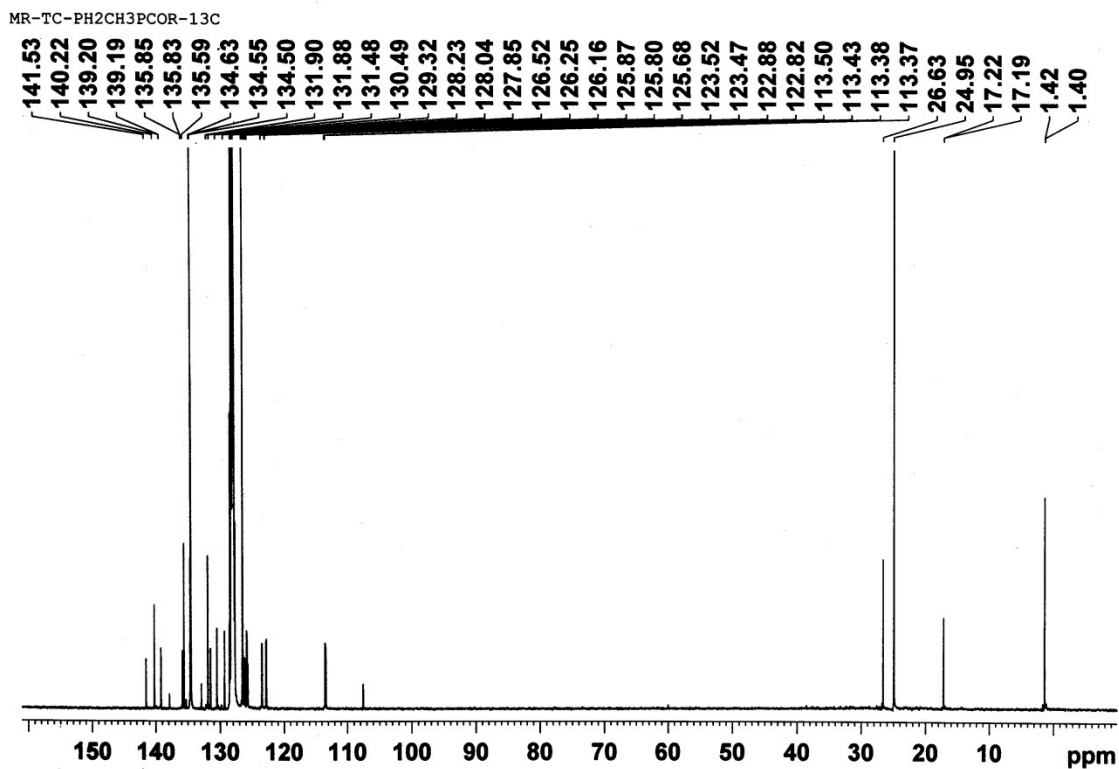

Figure S11.  $^{13}\text{C}$  NMR spectrum of compound 4 recorded in  $\text{C}_6\text{D}_6$  at room temperature.

MR-TC-TBU-PCOR-13C

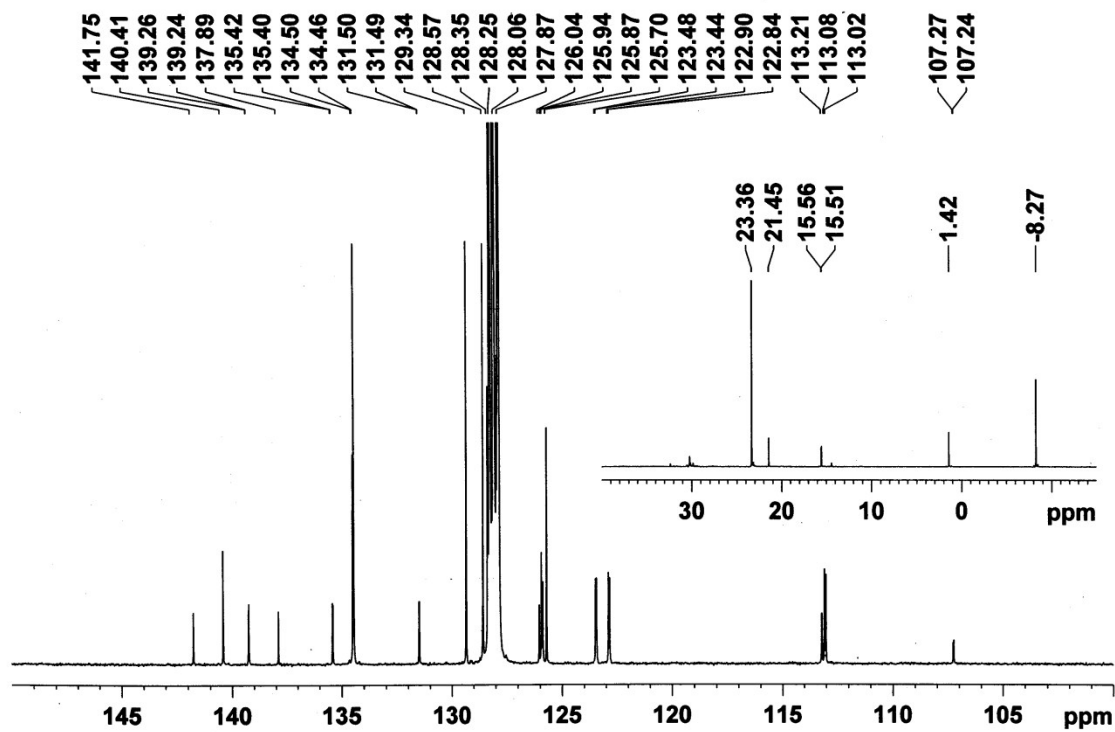

Figure S12.  $^{13}\text{C}$  NMR spectrum of compound 5 recorded in  $\text{C}_6\text{D}_6$  at room temperature.

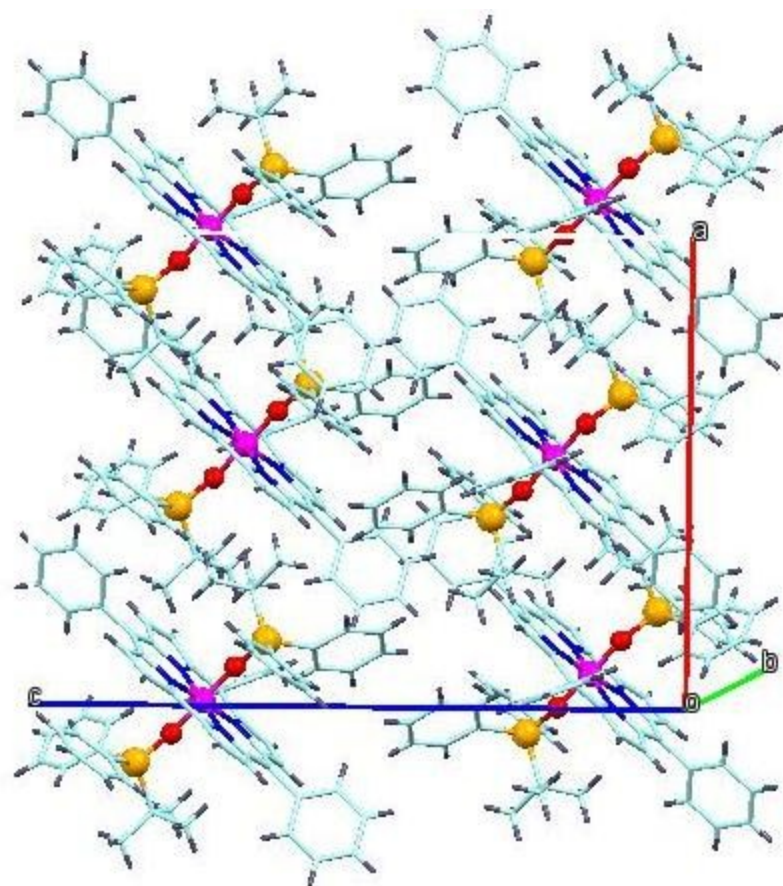

**Figure S13.** Unit cell packing diagram for **4** as determined from the single crystal structural analysis.
